# Supplementary material
Source: PubMed Central journal article supplement (PMC6551225)
Supplement: EMS83061-supplement-Table_S1.pdf [file EMS83061-supplement-Table_S1.pdf]

**Table S1.** Publications contributing heteroplasmy values m.3243A>G and m.8993T>G for meta-analysis.

| m.3243A>G mutation |               |                            | m.8993T>G mutation |               |                              |
|--------------------|---------------|----------------------------|--------------------|---------------|------------------------------|
| Pedigrees          | Transmissions | Reference                  | Pedigrees          | Transmissions | Reference                    |
| 3                  | 8             | (Ciafaloni et al., 1992)   | 1                  | 3             | (Holt et al., 1990)          |
| 2                  | 8             | (Martinuzzi et al., 1992)  | 1                  | 1             | (Sakuta et al., 1992)        |
| 1                  | 5             | (Huang et al., 1994)       | 1                  | 2             | (Puddu et al., 1993)         |
| 1                  | 4             | (Liou et al., 1994)        | 1                  | 4             | (Shoffner et al., 1992)      |
| 6                  | 15            | (Hammans et al., 1995)     | 1                  | 5             | (Tatuch et al., 1992)        |
| 3                  | 8             | (Iwanishi et al., 1995)    | 1                  | 2             | (Ciafaloni et al., 1993)     |
| 1                  | 2             | (Rusanen et al., 1995)     | 4                  | 6             | (Santorelli et al., 1993)    |
| 1                  | 1             | (Fabrizi et al., 1996)     | 1                  | 5             | (Fryer et al., 1994)         |
| 1                  | 3             | (Huang et al., 1996)       | 1                  | 1             | (Lodi et al., 1994)          |
| 2                  | 8             | (Jansen et al., 1997)      | 1                  | 1             | (Pastores et al., 1994)      |
| 1                  | 2             | (Vilarinho et al., 1997)   | 1                  | 6             | (Degoul et al., 1995)        |
| 1                  | 1             | (Wilichowski et al., 1998) | 1                  | 3             | (Houstek et al., 1995)       |
| 3                  | 12            | (Olsson et al., 1998)      | 1                  | 8             | (Makela-Bengs et al., 1995)  |
| 2                  | 2             | (Onishi et al., 1998)      | 1                  | 2             | (Tulinius et al., 1995)      |
| 1                  | 2             | (Chinnery et al., 1999)    | 1                  | 3             | (Bartley et al., 1996)       |
| 1                  | 8             | (Dubeau et al., 2000)      | 1                  | 3             | (Mak et al., 1996)           |
| 1                  | 1             | (Hotta et al., 2001)       | 1                  | 4             | (Ferlin et al., 1997)        |
| 1                  | 2             | (Ko et al., 2001)          | 4                  | 9             | (Uziel et al., 1997)         |
| 1                  | 5             | (Lien et al., 2001)        | 4                  | 16            | (White et al., 1999)         |
| 1                  | 2             | (Morovvati et al., 2002)   | 1                  | 2             | (Porto et al., 2001)         |
| 1                  | 3             | (Cervin et al., 2004)      | 1                  | 2             | (Wong et al., 2002)          |
| 1                  | 1             | (Chou et al., 2004)        | 1                  | 3             | (Enns et al., 2006)          |
| 1                  | 1             | (Lu et al., 2002)          | 1                  | 3             | (Steffann et al., 2007)      |
|                    |               |                            | 2                  | 5             | (Mkaouar-Rebai et al., 2009) |
